# Supplementary material for: Protective Effects of Scolopendra Water Extract on Trimethyltin-Induced Hippocampal Neurodegeneration and Seizures in Mice
Source: MDPI journal article supplement (doi:10.3390/brainsci9120369), 2019-12-12
Supplement: s1 [file s1]

## Supplementary materials

### Post treatment protocol

To assess the effects of SWE on TMT-induced injury, mice were administered SWE (50 mg/kg) periorally (p.o) for 4day daily, after being given 2.6 mg/kg TMT ( $n = 6$  mice per group). Behaviors were observed for 3 consecutive days after TMT treatment (Supplementary Figure S1).

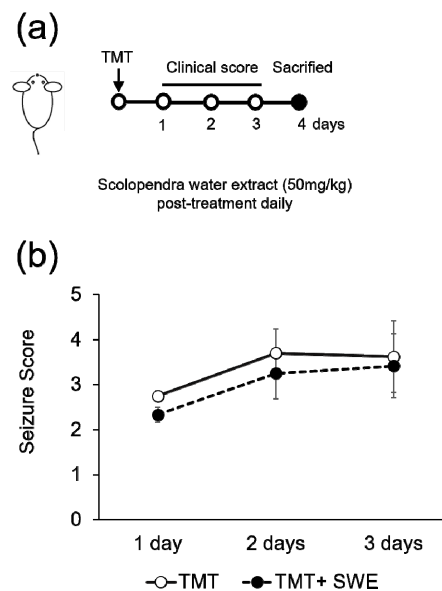

**Supplementary Figure S1.** Protective effects of SWE on seizure symptoms, in TMT-treated mice. (a) Schematic diagram of drug treatment, and behavioral test. (b) SWE treatment did not have effect on the TMT-induced seizure behaviors ( $n = 6$  mice per group). Values are reported as mean  $\pm$  SE \*  $p < 0.05$ .
